# Supplementary material for: Electrodeposition and properties of TEMPO functionalized polythiophene thin films
Source: Royal Society of Chemistry journal article supplement (doi:10.1039/c0py00308e), 2010-11-26
Supplement: c0py00308e.pdf [file c0py00308e.pdf]

Supplementary Material (ESI) for Polymer Chemistry

This journal is (c) The Royal Society of Chemistry 2011

Electronic Supplementary Information

**Electrodeposition and Properties of TEMPO Functionalized Polythiophene Thin Films**

Tamara K. Kunz, Michael O. Wolf\*

Department of Chemistry. University of British Columbia.

2036 Main Mall, Vancouver, BC V6T 1Z1, Canada

\*[mwolf@chem.ubc.ca](mailto:mwolf@chem.ubc.ca)

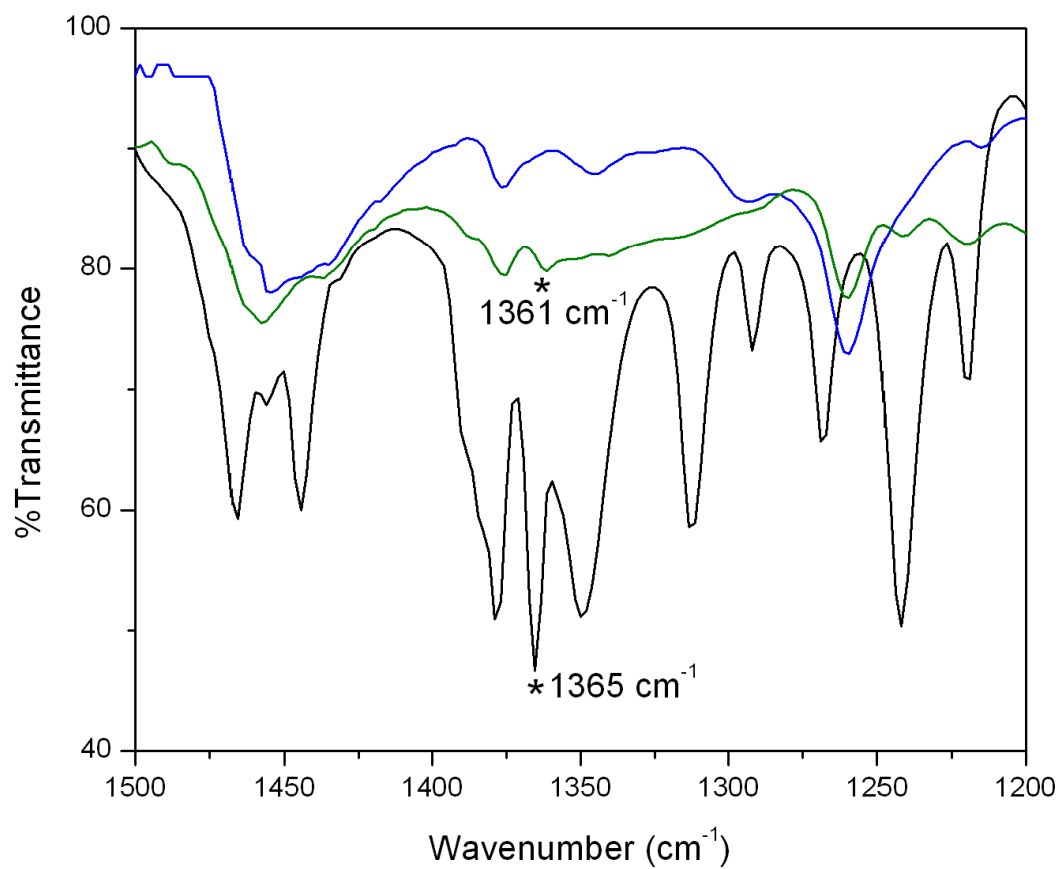

**Fig. S1.** IR spectra of **poly-3** (green), **poly-1** (blue), and **2** (black) displaying the fingerprint region. (\*) indicates the  $\nu(\text{NO}\cdot)$  stretching frequency.

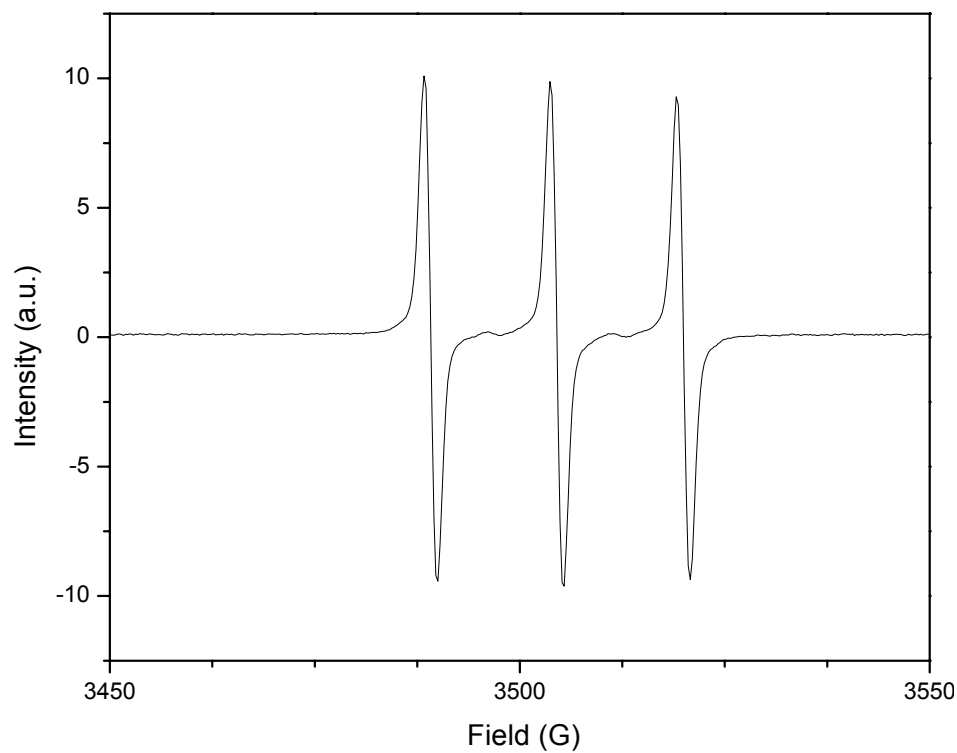

**Fig. S2.** X-band ESR spectrum of **poly-3** in  $C_6H_6$  solution at 22 °C. Modulation Frequency: 20.00 kHz. Modulation Amplitude: 0.02 G. Time Constant: 2.56 s. Gain: 60 dB. Sweep Width: 150.6 G.

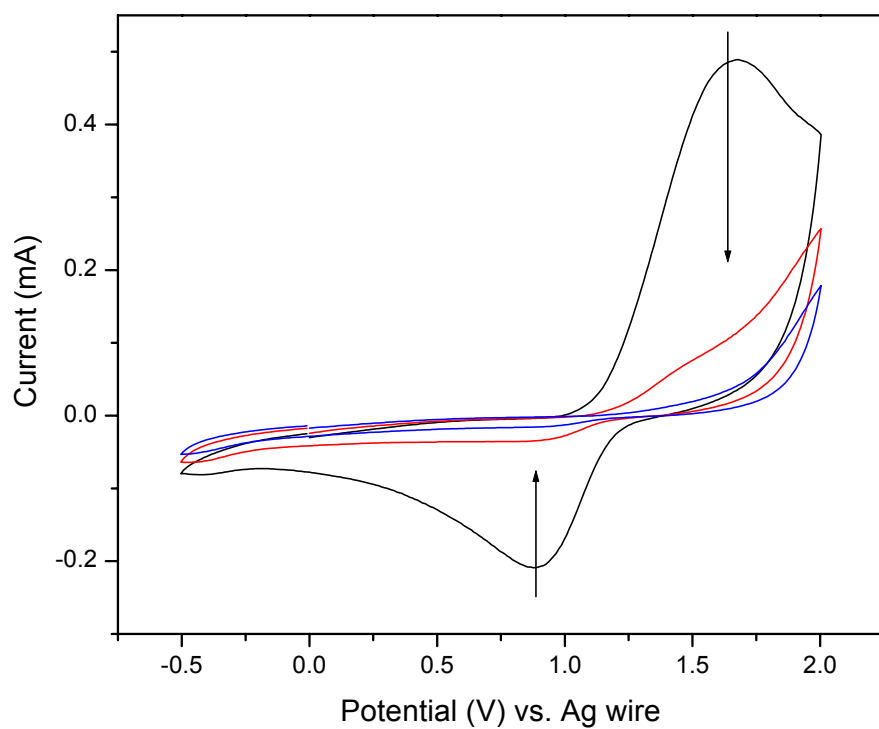

**Fig. S3.** Cyclic voltammetry of **poly-3** on an ITO working electrode. 0.1 M  $[n\text{-Bu}_4\text{N}]\text{PF}_6$  in  $\text{CH}_3\text{CN}$ . Scan rate =  $100 \text{ mVs}^{-1}$ .
